# Supplementary material
Source: PubMed Central journal article supplement (PMC8995386)

## Single-molecule mapping of replisome progression.

Clémence Claussin, Jacob Vazquez and \*Iestyn Whitehouse

## Supplemental Information

**Script S1:** Tornado plot script. To generate all the tornado plots in Figure 1, 3, 4 and 5. Also related to the Figure S2, S3, S4, and S7.

**Script S2:** rDNA heatmap script. To generate all the rDNA heatmap in Figure 2.

### Supplementary figure legends

**Figure S1:** Mcm4-Mnase tag does not affect cell growth. **A.** Drop test showing no growth defect of MCM4-MNase fusions. **B.** Flow cytometry data from one of the replicon-seq sequencing from WT and *rrm3Δ* mutant. BrdU is added at 2h15 during  $\alpha$ -factor arrest for 30min and cells are released in S phase in presence of BrdU **C.** The Mcm4-Mnase tag cleaves origin DNA in presence of calcium in G1. DNA was digested with *EcoRI* and probed with radiolabeled DNA binding to ARS305. In absence of cleavage by Mcm4-MNase 6kb band is observed, upon calcium addition Mcm4-MNase specifically cleave DNA at ARS releasing a 3kb band. **D.** Frequency plot of WT reads length, excluding rDNA. Blue bars show all BrdU containing reads,  $n=1.59 \cdot 10^5$  (Methods). Orange bars show reads selected to overlap origins of replication ( $n=8.9 \cdot 10^4$ ). **E.** Venn diagram comparing Replicon-seq early S-phase replication origin calls (Methods) to known origins of replication. Total origins called: replicon-seq  $n=176$ , total OriDB (Confirmed) origins  $n=401$ , late OriDB  $n=76$ , early OriDB  $n=72$ , likely  $n=214$ . Related to Figure 1.

**Figure S2:** Tornado plots of WT Replicates. Related to Figure 1.

**Figure S3:** Tornado plots of the budding yeast chromosomes 1 to 8 for WT cells. Related to Figure 1 and to compare to Figure S6, S7 and Figure 3.

**Figure S4:** Tornado plots of the budding yeast chromosomes 9 to 16 for WT cells. Related to Figure 1 and to compare to Figure S6, S7 and Figure 3.

**Figure S5:** Schematic representation of MNase cleaving ssDNA at replication fork and library preparation for Replicon-seq. Cleavage of ssDNA at the replication fork should result in preferential digestion of the unwound parental DNA. Related to Figure 1A.

**Figure S6:** Tornado plots of the budding yeast chromosomes 1 to 8 for *rrm3* $\Delta$  mutants. Black arrows indicate prominent sites of termination failure. Related to Figure 4. Compare with Figure S3 and S4.

**Figure S7:** Tornado plots of the budding yeast chromosomes 9 to 16 for *rrm3* $\Delta$  mutants. Black arrows indicate prominent sites of termination failure. Related to Figure 4. Compare with Figure S3 and S4.

**Figure S8:** Replication fork pausing sites in *rrm3* $\Delta$  mutant. **A.** Median position of read ends in 250bp intervals was calculated for different length replicons emanating from the replication origin (from Figure 3A). The relative positions of the left and right replisomes are plotted at increasing distance from the origin. Green track represents the tRNA position. Red line shows the expected

trajectory if both replicons are moving at the same rate. **B.** Same as A, but depicting data from Figure 3B. Red track represents the centromere position. Red line shows the expected trajectory if both replicons are moving at the same rate **C.** Diagram representing all the pausing site called from replicon-seq sequencing in *rrm3Δ* mutant in early S-phase. **D.** Meta-plot showing the distance of the 3' of the rightward moving fork leading strand (black) or the leftward moving fork of the leading strand 5' end (red) near the transcription site of 253 tRNA genes in *rrm3Δ*. Green dotted line shows the upstream edge of TFIIIB. **E.** Same as C, and Figure 4E for pausing at centromeres. Related to Figure 4.

**Figure S9:** Converging replisomes do not significantly slow at termination site. Relative progression of sister replisomes is plotted for Left origin (ARS510) and Right origin (ARS511). The Right fork of the ARS510 and the Left fork of ARS511 converge to terminate approximately 13kb from each origin. The median position of replisomes in 250bp intervals from the replication origin is calculated. Related to Figure 5.

**Figure S10:** Replication of the rDNA locus in *rrm3Δ* cells. **A.** 5' and 3' DNA ends are plotted for of either Bottom or Top-strand reads at the rDNA locus. Upper tracks show the genome coverage of the 3' or 5' ends of reads. **B.** Replication fork pausing at RFB site is not altered in *rrm3Δ* mutant. Counts of 5' and 3'ends of the lagging or leading strands of replisomes approaching the RFB from the rightward moving fork. Upper graphs show 2-4kb reads, lower show 6-8kb reads. Prominent rDNA features are displayed in the lower track. Compare to Figure 2 **C, D, E** and **F.** Related to Figure 4 and 5.

**Figure S11:** Gene block sequence for N-terminal MNase tag of MCM4. The MNase-sequence is in Bold letters and the linker in purple. Related to Start Method section and Figure S1 for generation of the replicon-seq strain.

**Figure S12:** Nascent RNA sequencing. Correlation of two biological replicates of nascent RNA seq data in early S-phase. Related to Figure 3.

## Script S1

```
import pandas as pd
from matplotlib import patches
from matplotlib import pyplot as plt
from matplotlib.collections import BrokenBarHCollection
import sys

# input files
gff_track = "input.gff"
bed_file = "input.bed"

# GFF Track Format:
# chromosome      source  feature  start  stop  score
orientation      frame  description
# chr4            0      EMBL CDS      1858  1890  .      +
                  0      Parent=chr4.chr4.final.6

# Bed Format:
# chromosome      start  stop  readID  brdU  orientation
# chr4            1920  3933  >read101  0.2  +

# input variables
chromosome = input("Enter the chromosome: ")
bed_column = "strand"
track1_feature_type = "gene"
track2_feature_type = "nascent_gene"
# To view all: Comment out line 44 or line that says this: track =
track[track["feature"] == feature_type]

# All features have to be written and assigned a color.
color_lookup = {
    '+': "blue",
    '-': "red"
}

# read bed file with read fragment information
genome = pd.read_table(bed_file, header=None, comment='#')
genome = genome[[0, 1, 2]]
genome = genome.rename(columns={0: "chr", 1: "start", 2: "stop"})
genome = genome[genome["chr"] == chromosome]
genome["length"] = genome["stop"] - genome["start"]
x = genome["stop"].max()
y = genome["length"].max()
lst = genome.values.tolist()

# read bed file with genome track information
track1 = pd.read_table(gff_track, header=None, comment='#')
```

```

track1 = track1.dropna(subset=[8])
track1 = track1[[0, 2, 3, 4, 6, 8]]
track1 = track1.rename(columns={0: "chr", 2: "feature", 3: "start", 4:
"stop", 6: "strand", 8: "description"})
track1 = track1[track1["chr"].str.contains(chromosome)]
track1["colors"] = track1[bed_column].apply(lambda x: color_lookup[x])
track2 = track1
track1 = track1[track1["feature"] == track1_feature_type]

track2 = track2[track2["feature"] == track2_feature_type]

# initiate plots
fig, axs = plt.subplots(3, gridspec_kw={'height_ratios': [30, 1, 1]},
sharex=True, sharey=False)

def features(df):
    df['width'] = df['stop'] - df['start']
    for chrom, group in df.groupby('chr'):
        yrange = (0, 1)
        xranges = group[['start', 'width']].values
        yield BrokenBarHCollection(xranges, yrange,
facecolors=group["colors"])

for i in range(len(lst)):
    box_size = 300
    #axs[0].add_patch(patches.Rectangle((lst[i][1], lst[i][3]-1/2),
lst[i][3], 1, color="blue", lw = 3, alpha = 0.1))
    #axs[0].add_patch(patches.Ellipse((lst[i][1], lst[i][3]),
box_size, box_size, angle = 225, color='blue', lw = 0.1, alpha = 0.4))
    #axs[0].add_patch(patches.Ellipse((lst[i][2], lst[i][3]),
box_size, box_size, angle = 225, color='purple', lw = 0.1, alpha = 0.4))
    axs[0].add_patch(patches.Rectangle((lst[i][1], lst[i][3]-1/2),
lst[i][3], 1, color='darkblue', lw = 2, alpha = 0.1))
    axs[0].axis('tight')
    axs[0].set_title(chromosome)
    axs[0].set_ylim(0, y)
    axs[0].set_ylabel("Length (bp)")

for collection in features(track1):
    axs[1].add_collection(collection)
    axs[1].axis('tight')
    axs[1].set_xlim(0, x)
    axs[1].get_yaxis().set_ticks([])

for collection in features(track2):
    axs[2].add_collection(collection)
    axs[2].axis('tight')
    axs[2].set_xlim(0, x)
    axs[2].set_xlabel("Position (bp)")
    axs[2].get_yaxis().set_ticks([])

for key, value in color_lookup.items():
    plt.plot([0], label=key, color=value)

```

```
plt.legend(bbox_to_anchor=(1, 34.5), frameon=False, ncol=2)

plt.subplots_adjust(wspace=0, hspace=0)
plt.show()
```

## Script S2

```
#####
# Creates a heatmap of length of read vs position
# Also creates a genome track
#####
import pandas as pd
import numpy as np
import matplotlib.pyplot as plt
import matplotlib.colors
from matplotlib.collections import BrokenBarHCollection

bed_file = 'input.bed'
gff_track = 'features.gff'

# GFF Track Format:
# chromosome      source  feature    start    stop    score
orientation      frame  description
# chr4            0      EMBL CDS      1858    1890    .      +
                0      Parent=chr4.chr4.final.6

# Bed Format:
# chromosome      start    stop    readID    brdU    orientation
# chr4            1920    3933    >read101  0.2     +

chr = 'rDNA' # Chromosome
start = 500 # Enter the start position of the region window.
stop = 8000 # Enter the end position of the region window.

chromosome = "rDNA"
bed_column = "strand"
track1_feature_type = "rDNA"

color_lookup = {
    '+': "orange",
    '-': "red"
}

#####

## read table into pandas
df = pd.read_csv(bed_file, delimiter="\t", names=["chr", "start", "end",
"readID", "brdU", "strand"])

## only select rows in which the start is greater than 500 and the stop
is less than 8kb and the chr is rDNA
df = df[(df['start'] >= start) & (df['end'] <= stop) & (df['chr'] ==
chr)]

## create length column
length = df["end"] - df["start"]
```



```

## Norm start values by subtracting 500 by each row in start column
rel_start = df['start'] #- start # Normailze Start Values.

## Norm end values by subtracting the start values by each row in end
column
rel_stop = df['end'] #- start # Normailze End Values.

## create length column
length = df["end"] - df["start"]

## insert Norm start column, norm end column, and length column
df.insert(0, 'Normalized Start', rel_start)
df.insert(1, 'Normalized End', rel_stop)
df.insert(2, 'length', length)

## sort the values by the length
df.sort_values(by=['length'])

## convert the dataframe to a list
lst = df.values.tolist()

## create the matrix length of being 8kb minus 500 (stop-start)
matrix_length = (stop - start) + 500

## create empty matrix with zeros has the shape 7500x7500
matrix = np.zeros((matrix_length, matrix_length))

## for each group of elements in the list, assign variables
for y in range(len(lst)):

    ## the normalized start row
    norm_start = lst[y][0]

    ## the normalized end row
    norm_end = lst[y][1]

    ## convert normalized start to int and normalized end to int
    norm_start = int(norm_start)
    norm_end = int(norm_end)

    ## the chromosome length column
    chr_length = lst[y][2]

    ## create matrix lengths
    for x in range(norm_start, norm_end):
        matrix[chr_length][x] += 1

#####

def parula_cmap():
    cmap = plt.cm.viridis # Set cmap to viridis
    cmaplist = [cmap(i) for i in range(cmap.N)] # Convert the cmap
values into a list, to be able to edit.
    cmaplist[0] = (0, 0, 0, 0) # Set the value of 0 to white.

```

```

    cmap = matplotlib.colors.LinearSegmentedColormap.from_list('mcm',
cmaplist, cmap.N)
    return cmap

#####

def features(df):
    df['width'] = df['stop'] - df['start']
    for chrom, group in df.groupby('chr'):
        yrange = (0, 1)
        xranges = group[['start', 'width']].values
        yield BrokenBarHCollection(xranges, yrange,
facecolors=group["colors"])

#####

# read bed file with genome track information
track1 = pd.read_table(gff_track, names=[0, 1, 2, 3, 4, 5, 6, 7, 8, 9,
10, 11, 12, 13], comment='#')
track1 = track1.dropna(subset=[8])
track1 = track1[[0, 2, 3, 4, 6, 8]]
track1 = track1.rename(columns={0: "chr", 2: "feature", 3: "start", 4:
"stop", 6: "strand", 8: "description"})
track1 = track1[track1["chr"].str.contains(chromosome)]
# track1["start"] = track1["start"] - start
# track1["stop"] = track1["stop"] - start
track1 = track1[track1["start"] >= start]
track1 = track1[track1["stop"] <= stop]
track1["colors"] = track1[bed_column].apply(lambda x: color_lookup[x])

#####

fig, axes = plt.subplots(2, gridspec_kw={'height_ratios': [30, 1]},
sharex=True, sharey=False)
im1 = axes[0].imshow(matrix, cmap=parula_cmap())
axes[0].axis('tight')
axes[0].invert_yaxis()
axes[0].set_xlim(start - 500, stop - 500)
# axes[0].set_xlim(start, stop)
fig.subplots_adjust(right=0.85)
cbar_ax = fig.add_axes([0.88, 0.15, 0.04, 0.7])
fig.colorbar(im1, cax=cbar_ax)
for collection in features(track1):
    axes[1].add_collection(collection)
axes[1].axis('tight')
axes[1].get_yaxis().set_ticks([])
# axes[1].set_xlim(start - 500, stop - 500)
axes[1].set_xlim(start, stop)
im1.set_clim(0,4)
plt.subplots_adjust(wspace=0, hspace=0)
plt.show()

```

# Figure S1

**A**

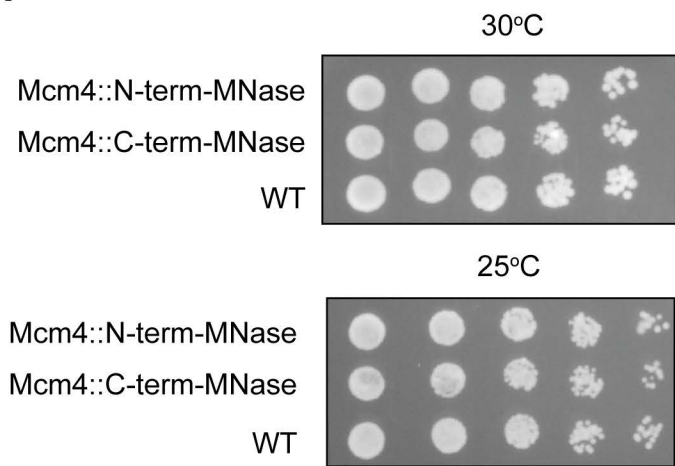

**C**

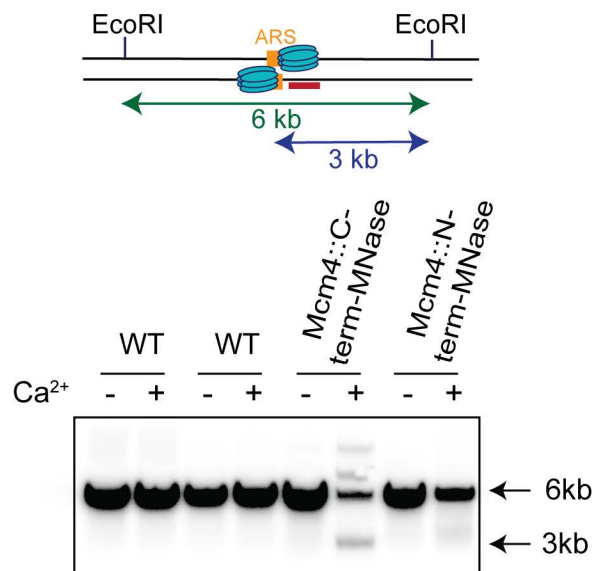

**B**

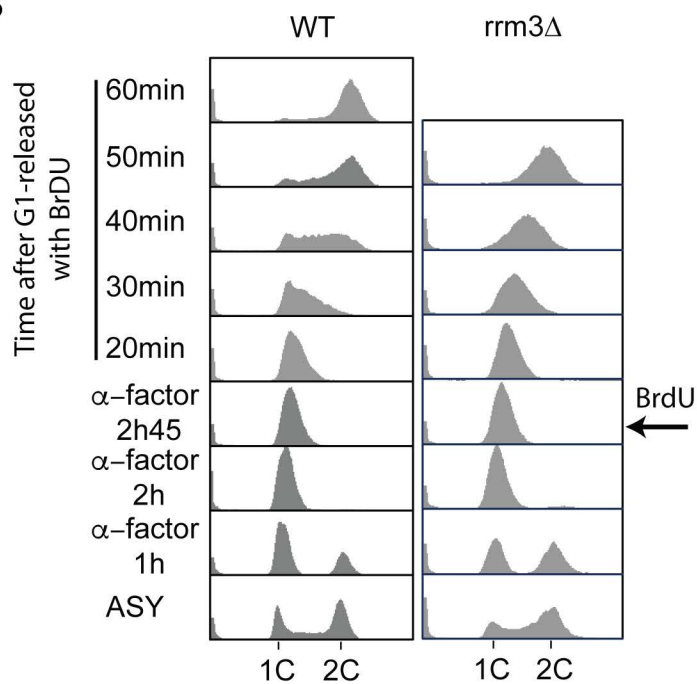

**E**

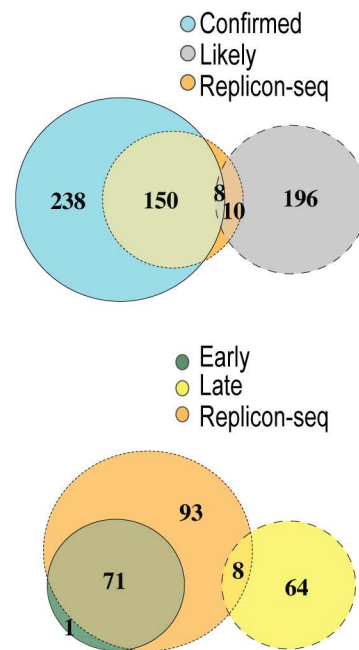

**D**

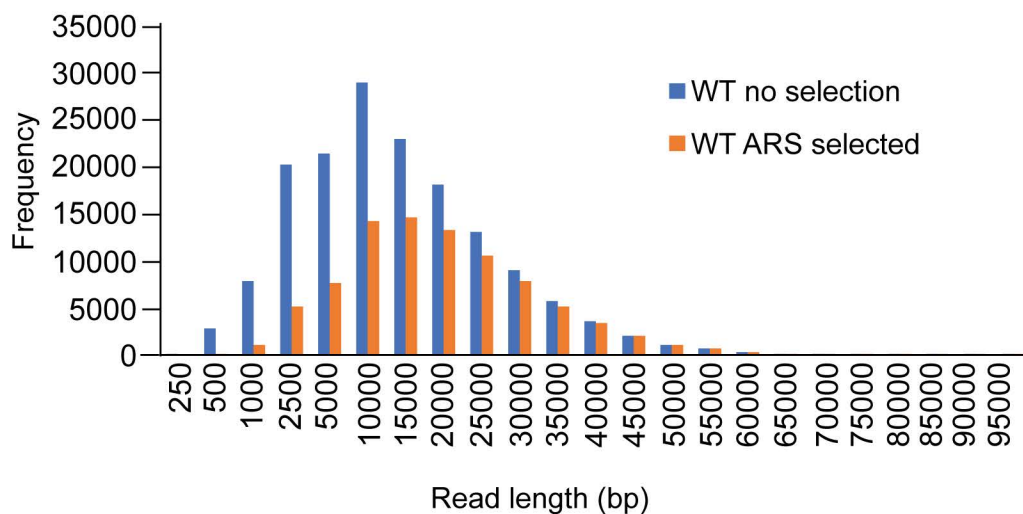

# Figure S2

## Replicate #1

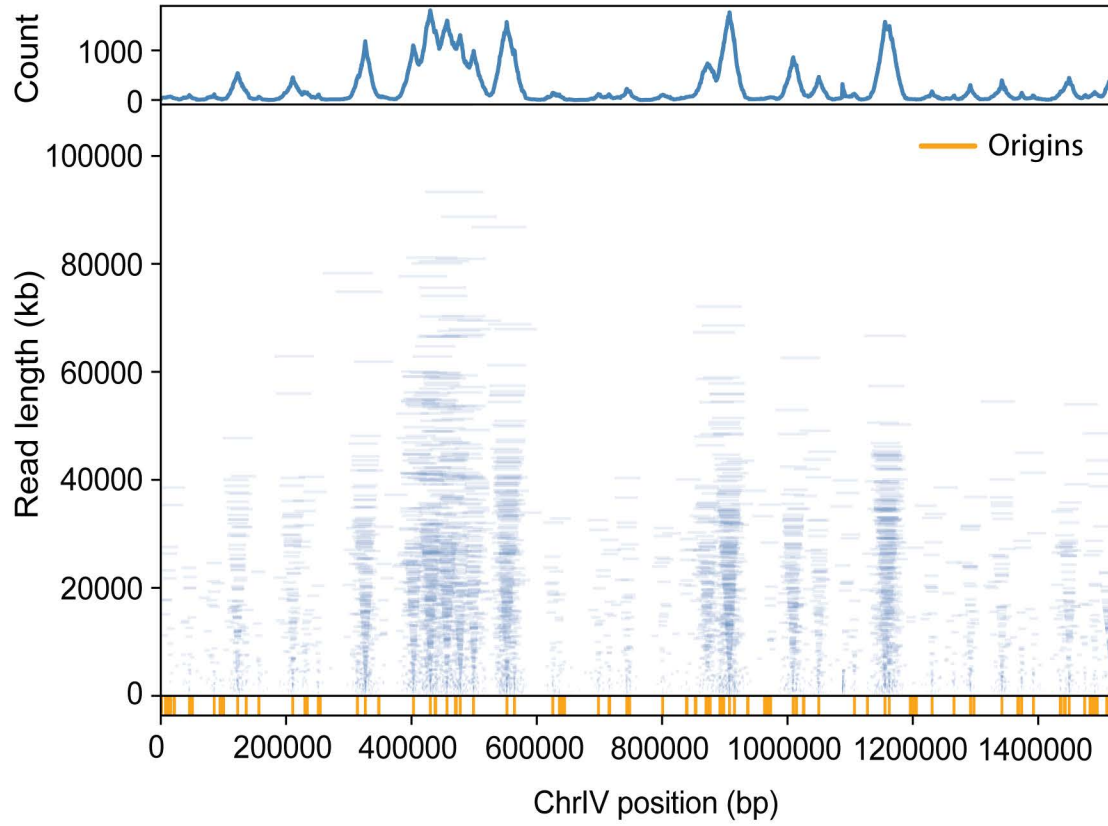

## Replicate #2

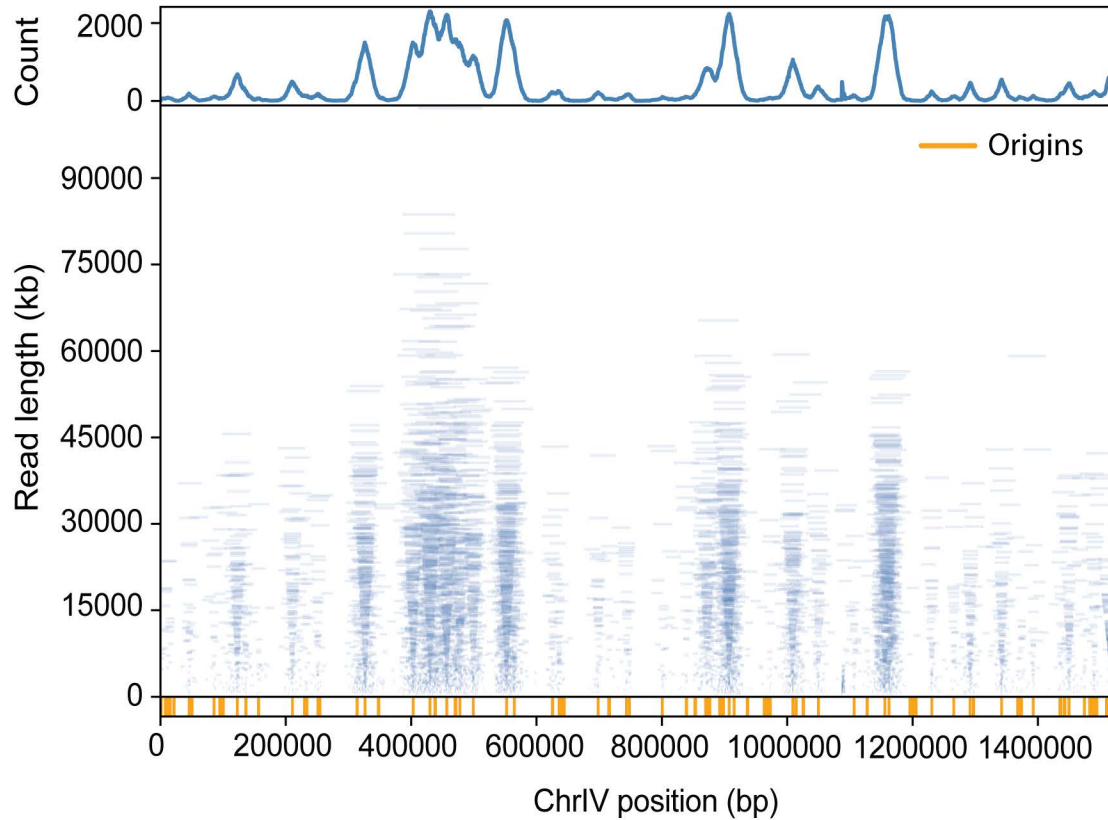

# Figure S3

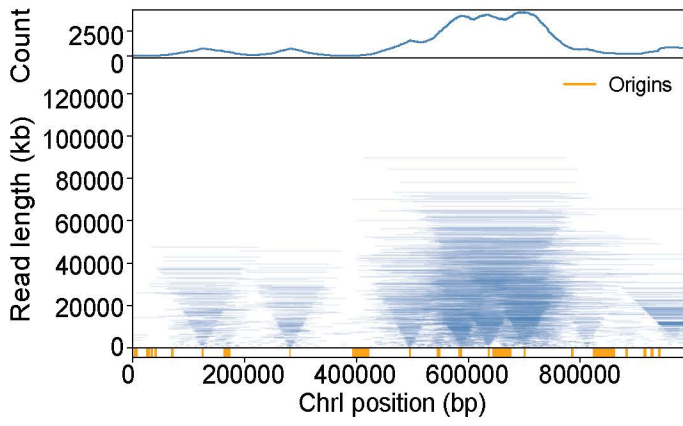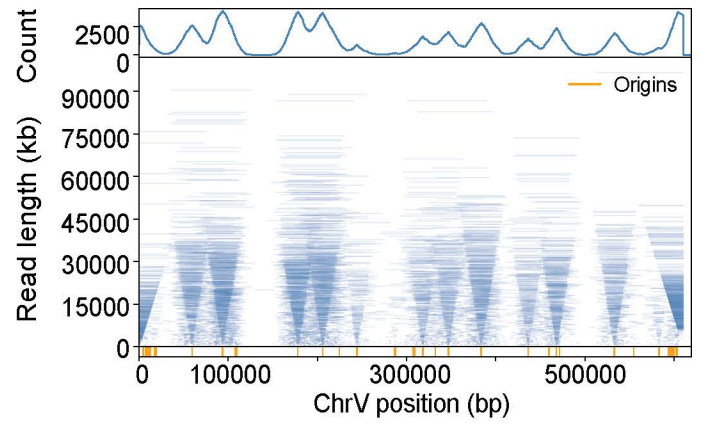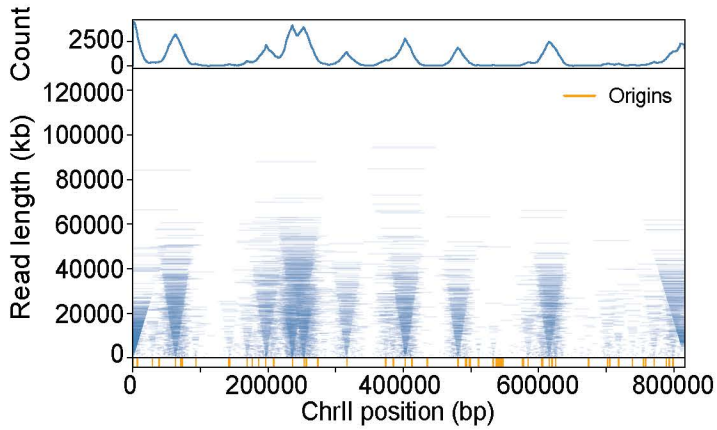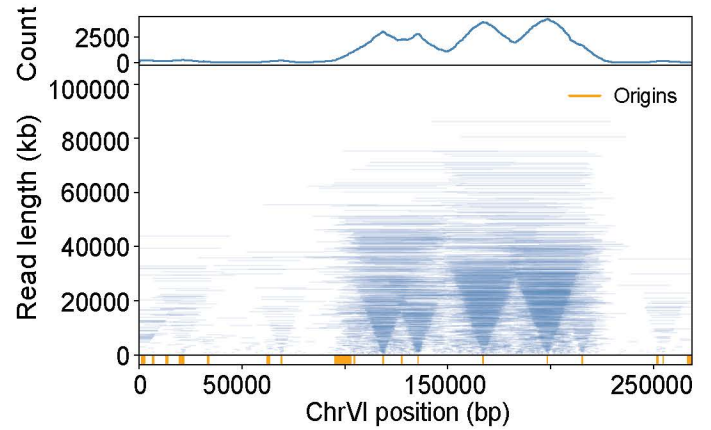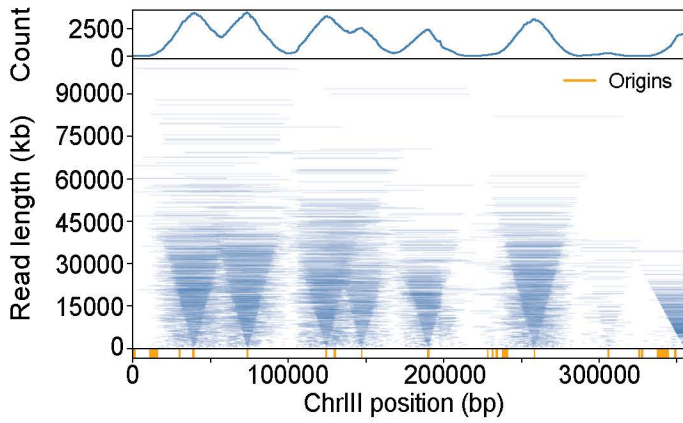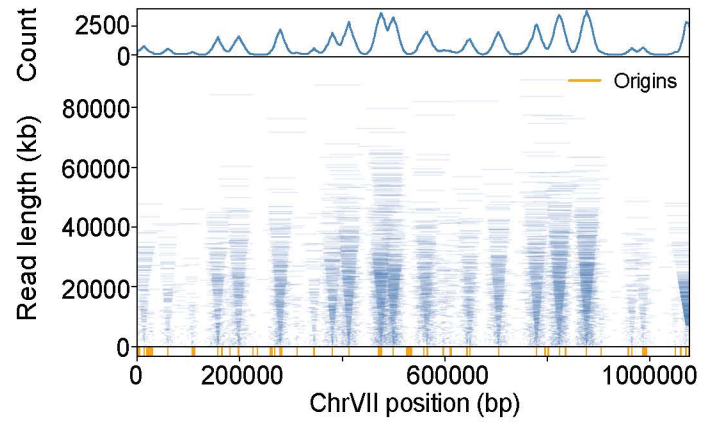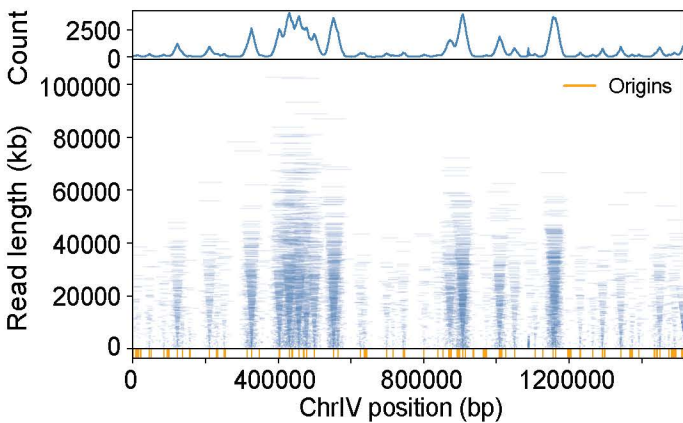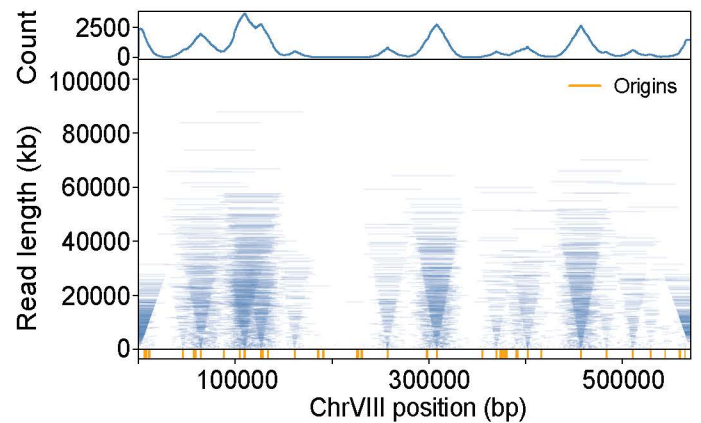

# Figure S4

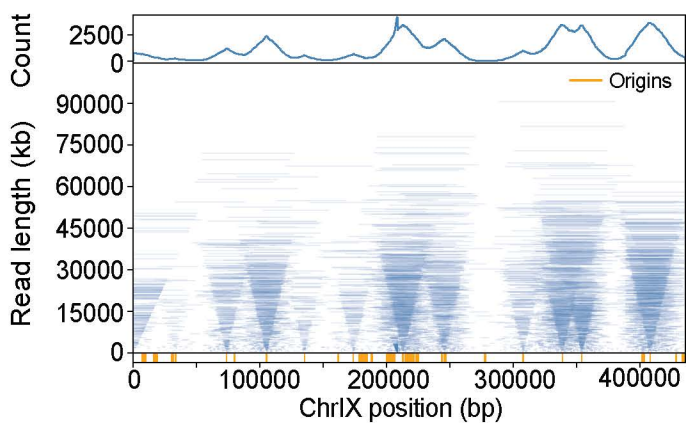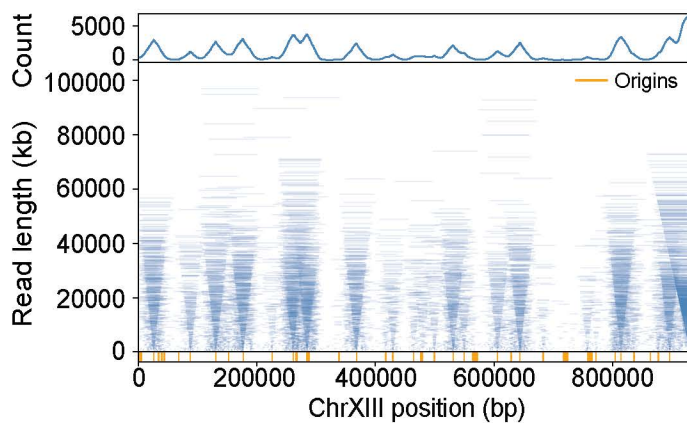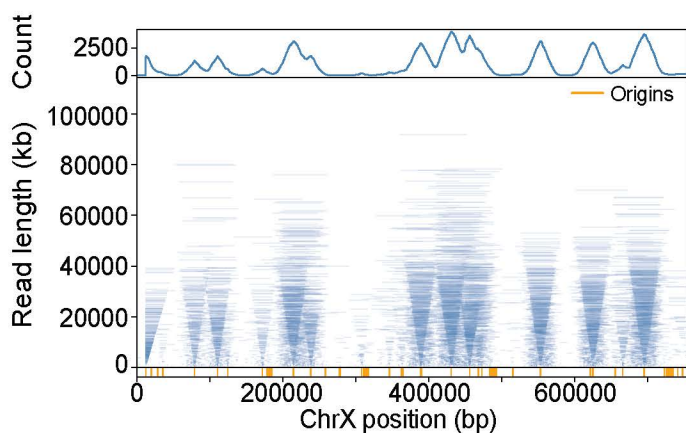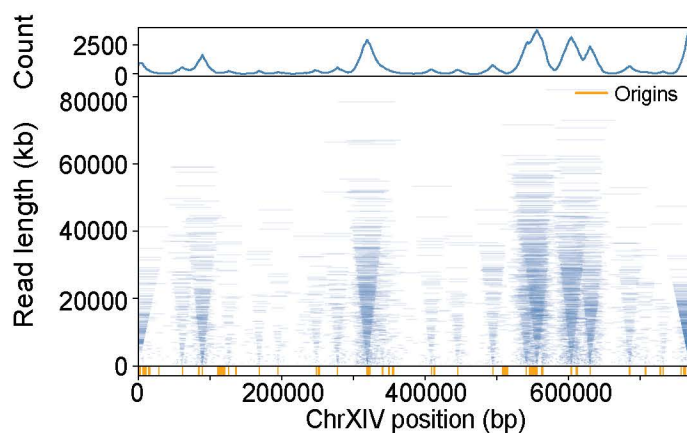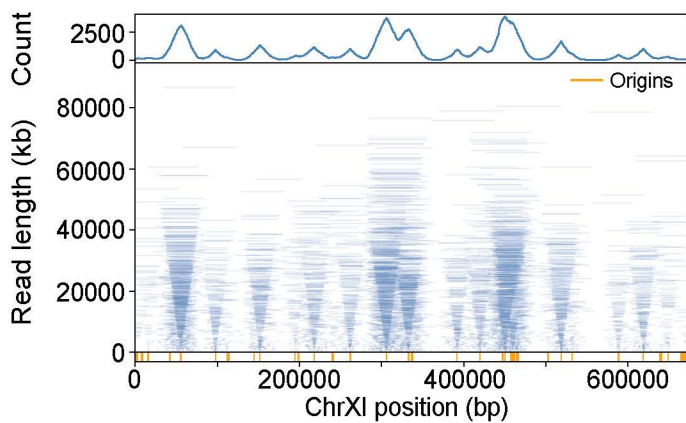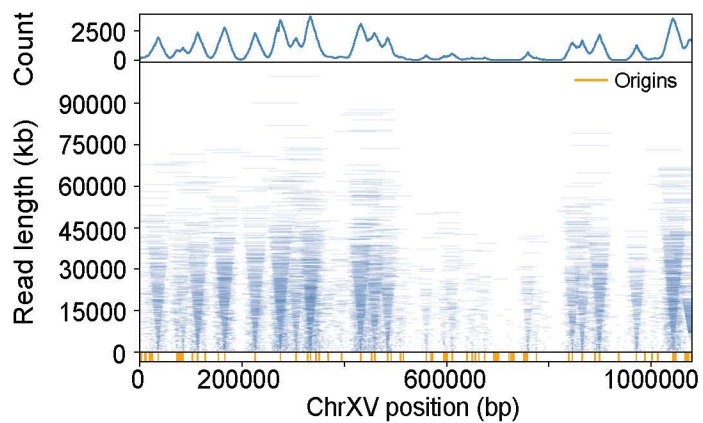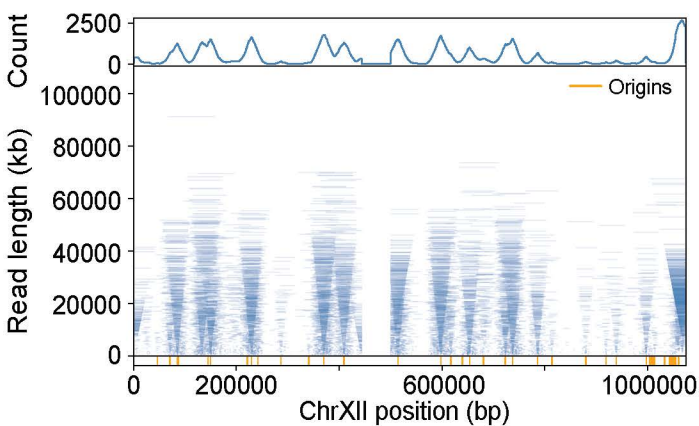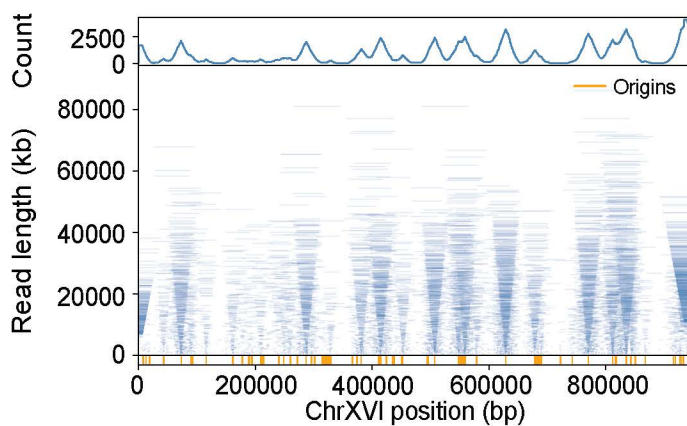

**Figure S5**

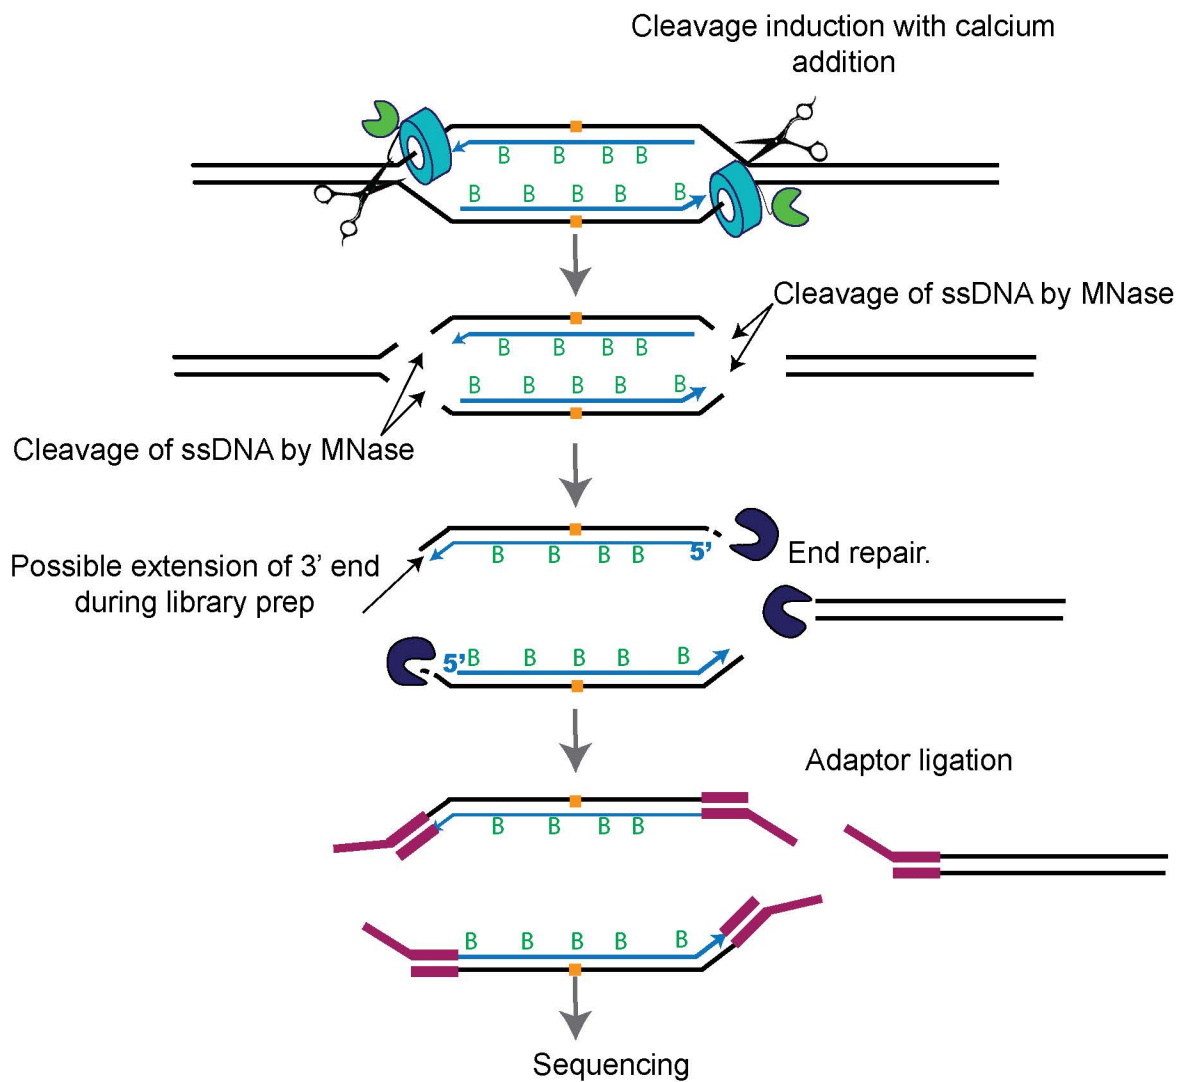

# Figure S6

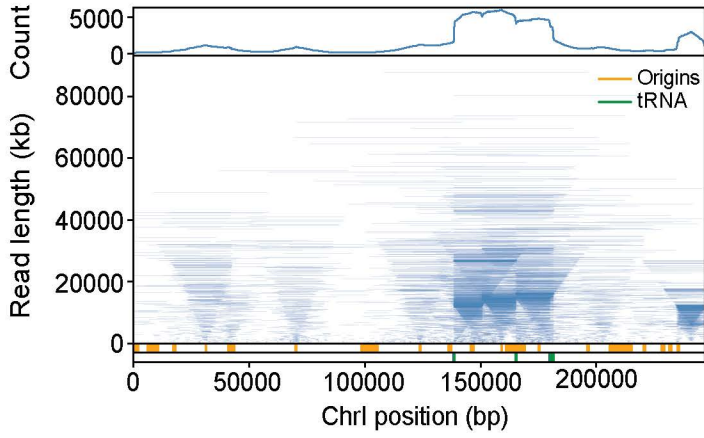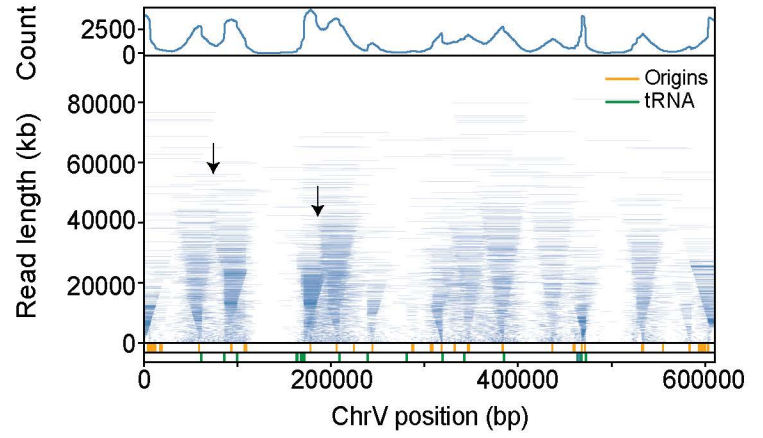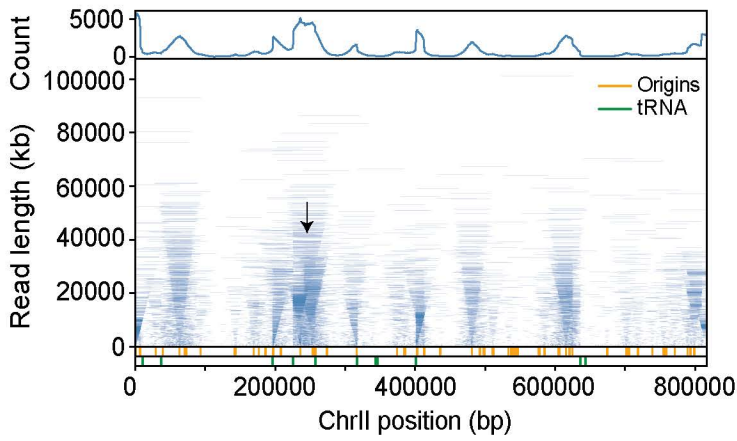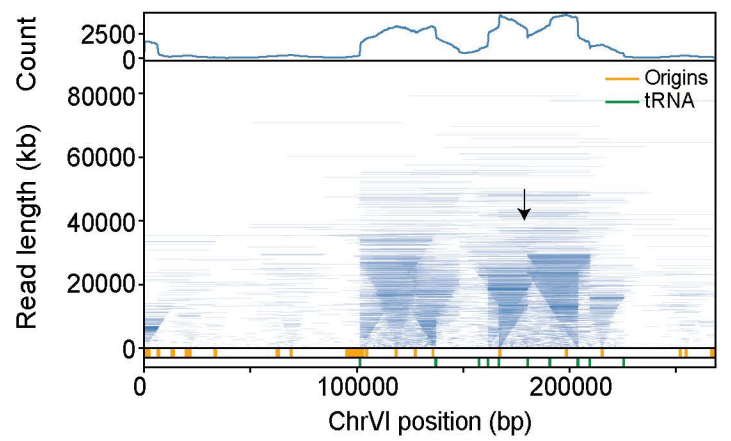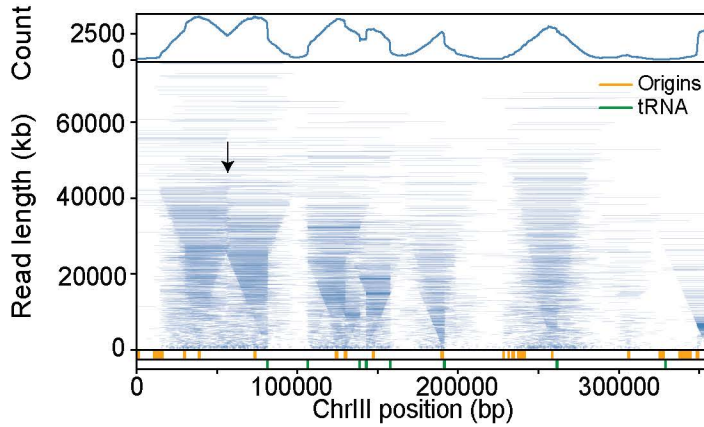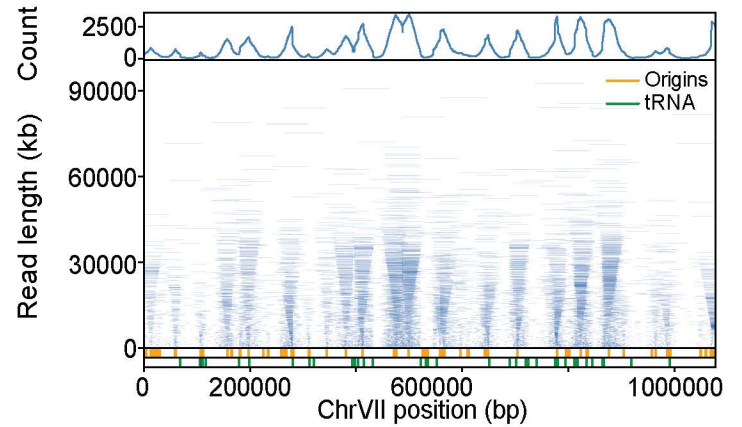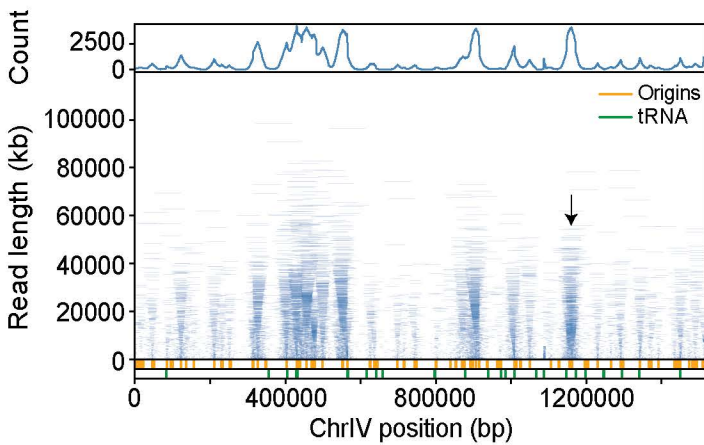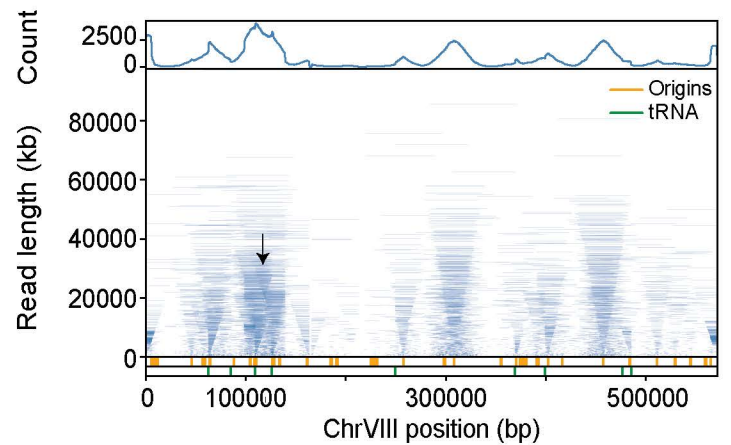



# Figure S7

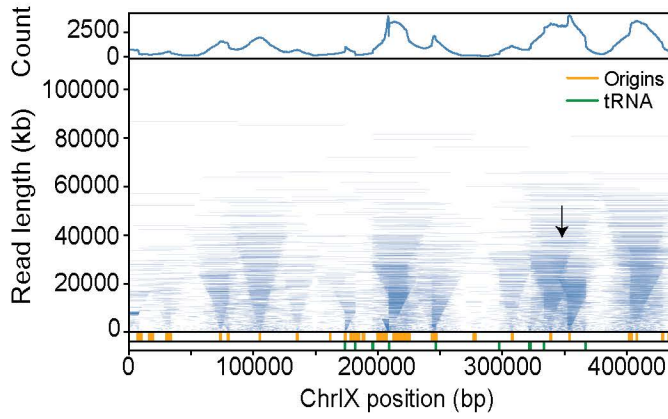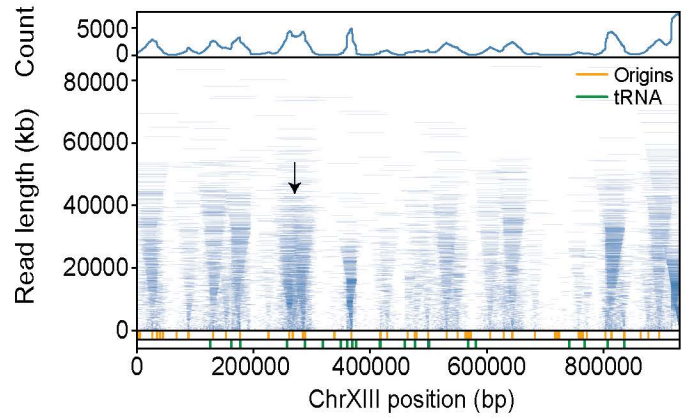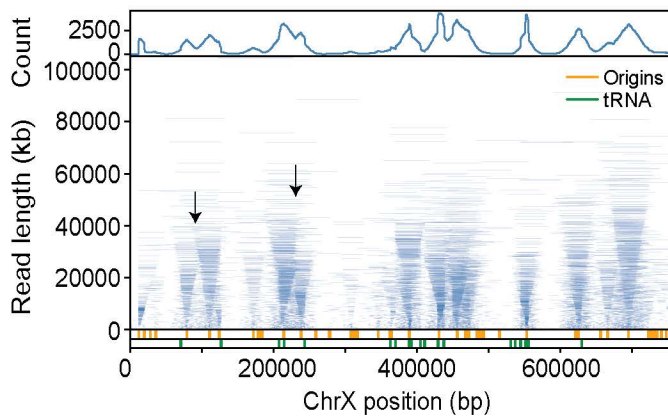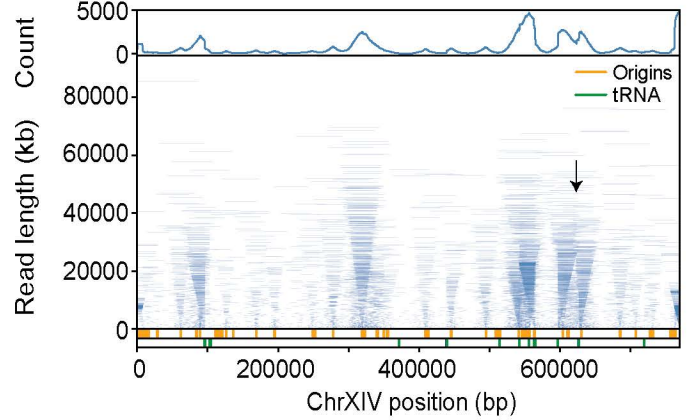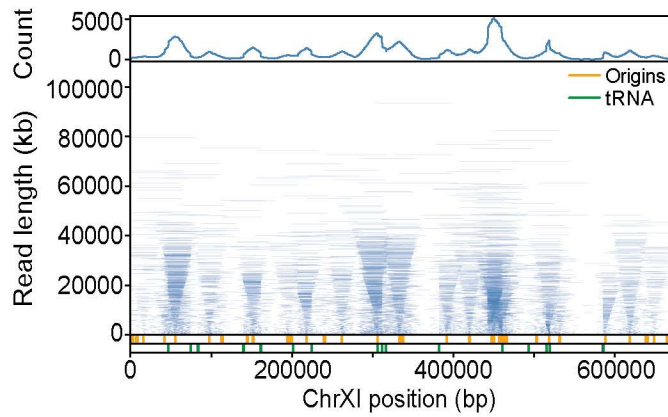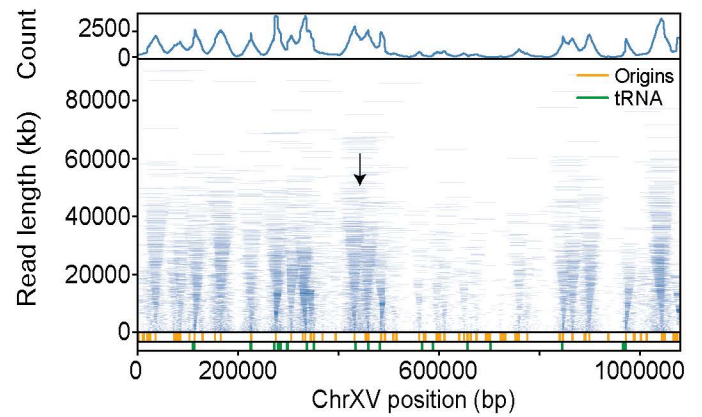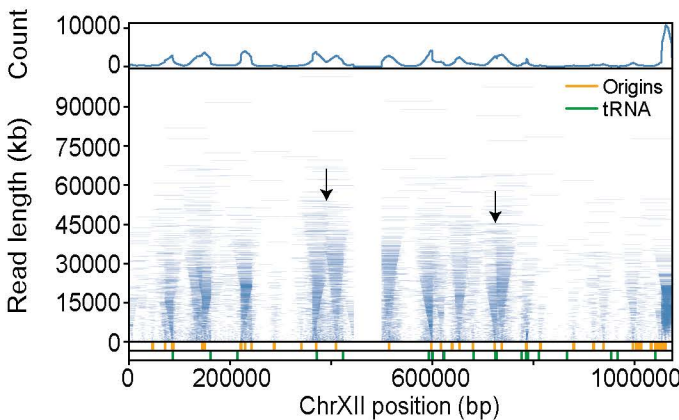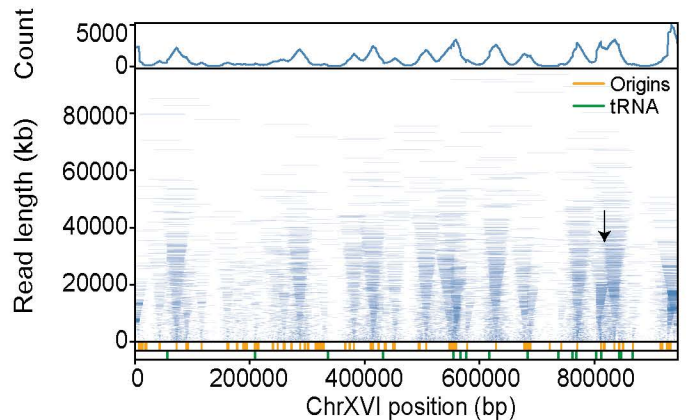

# Figure S8

**A**

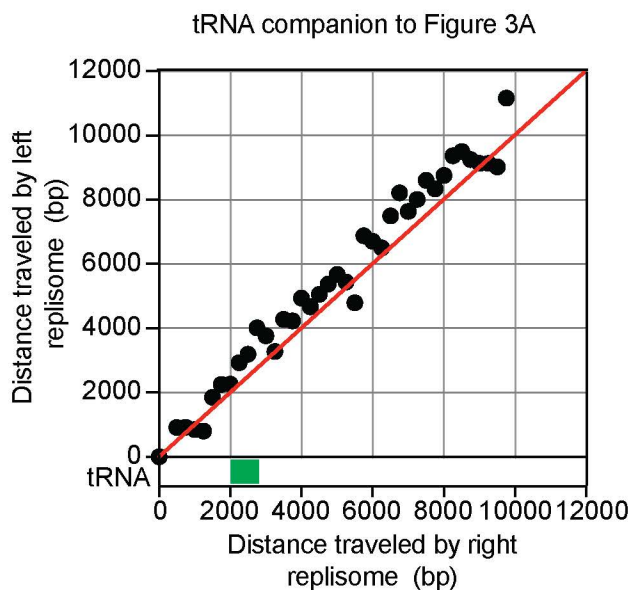

**B**

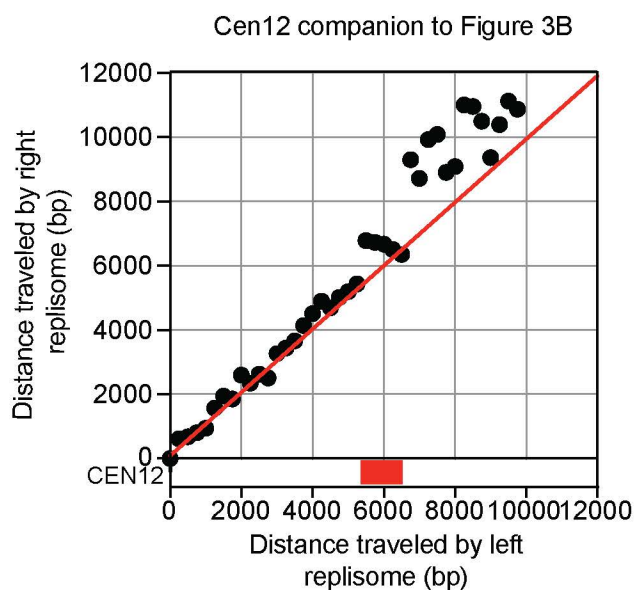

**C**

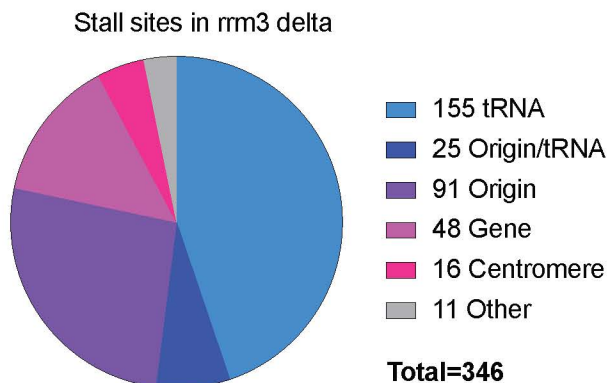

**D**

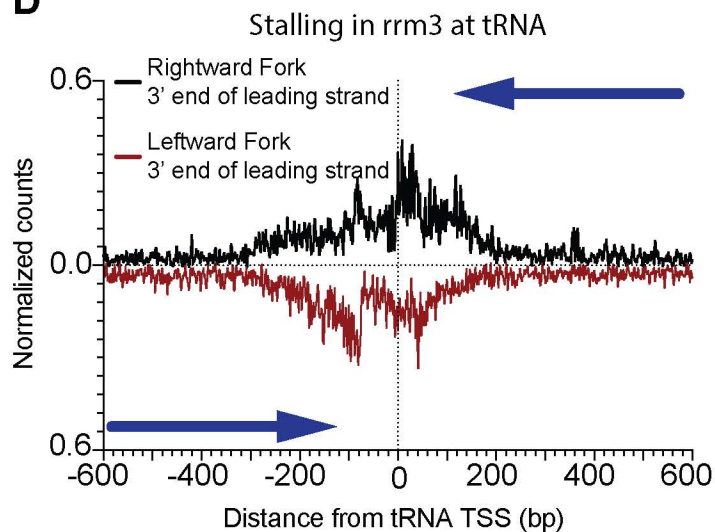

**E**

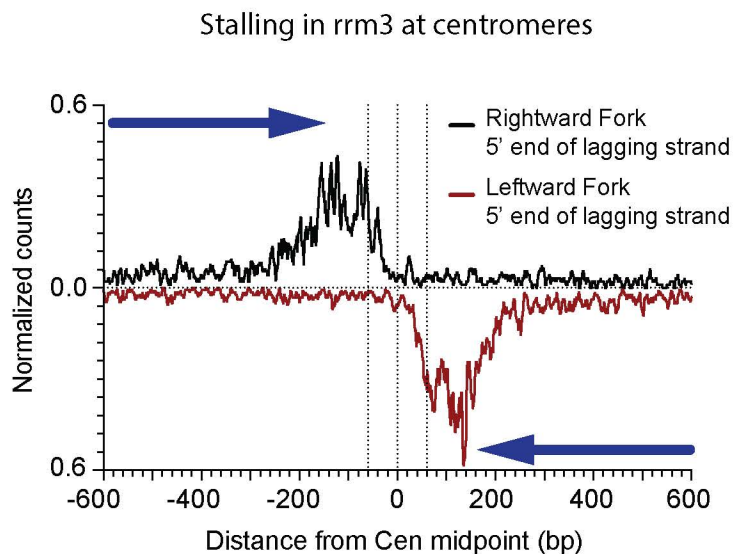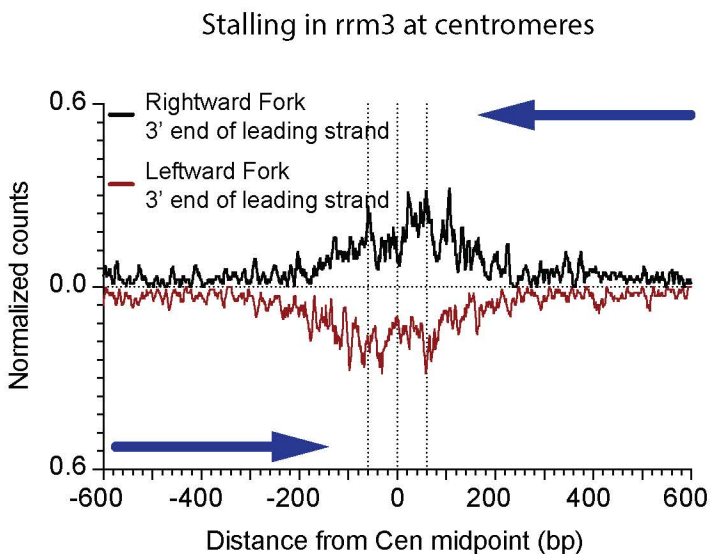

# Figure S9

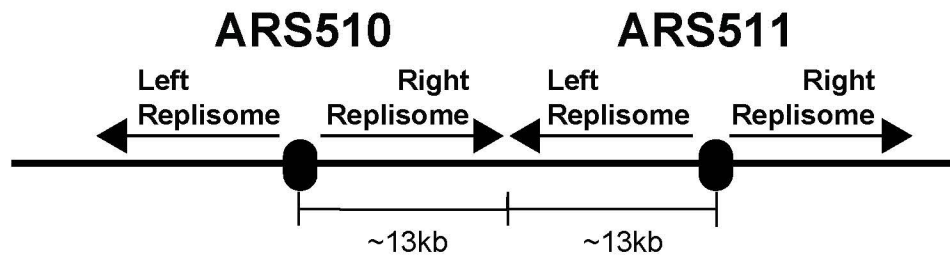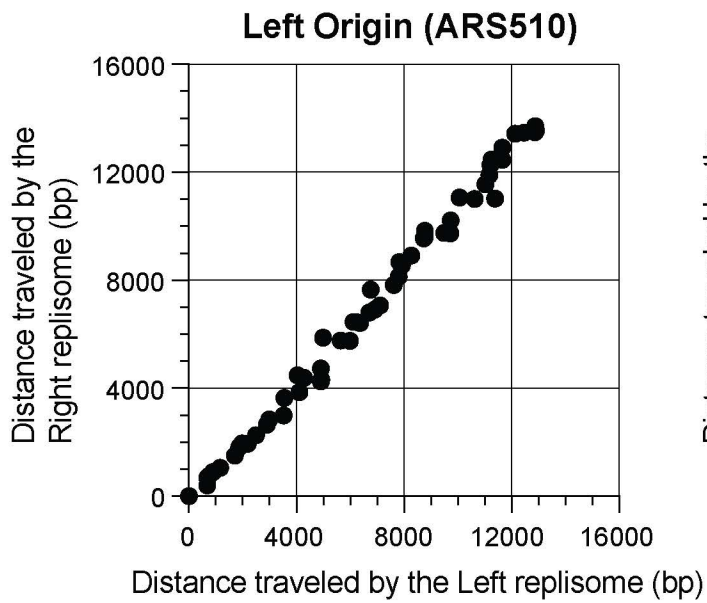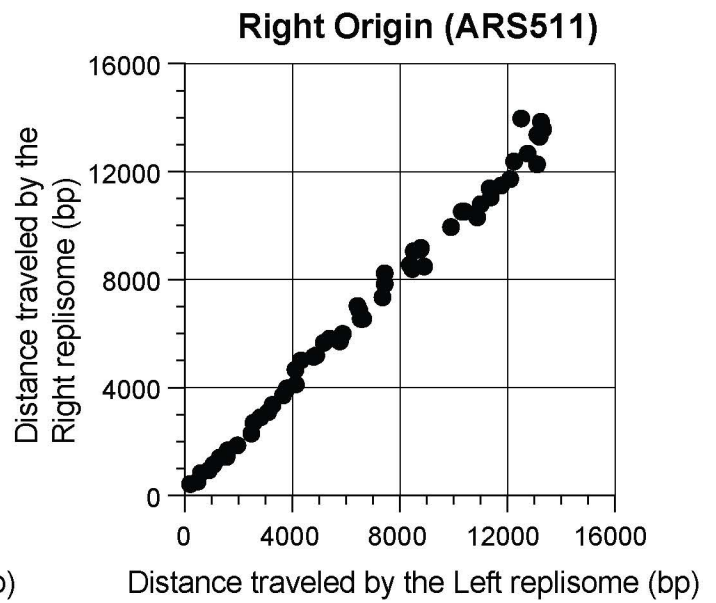

# Figure S10

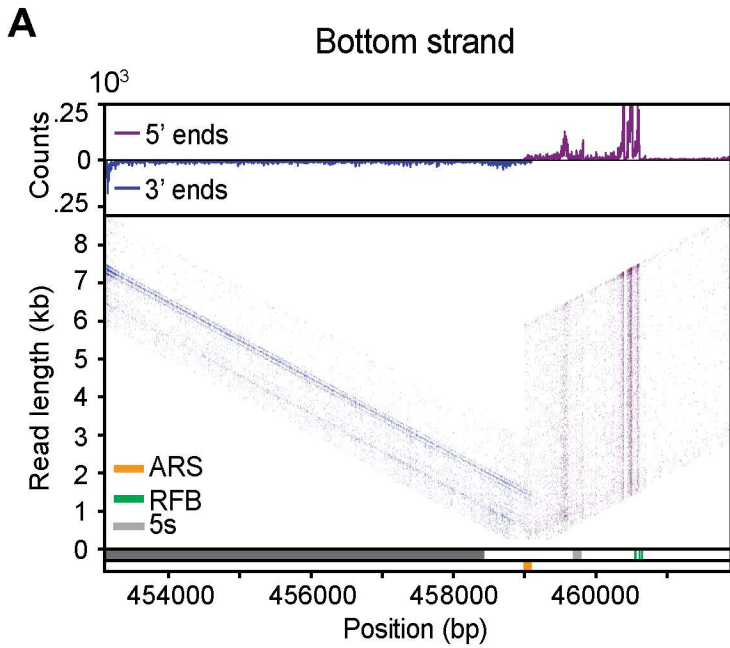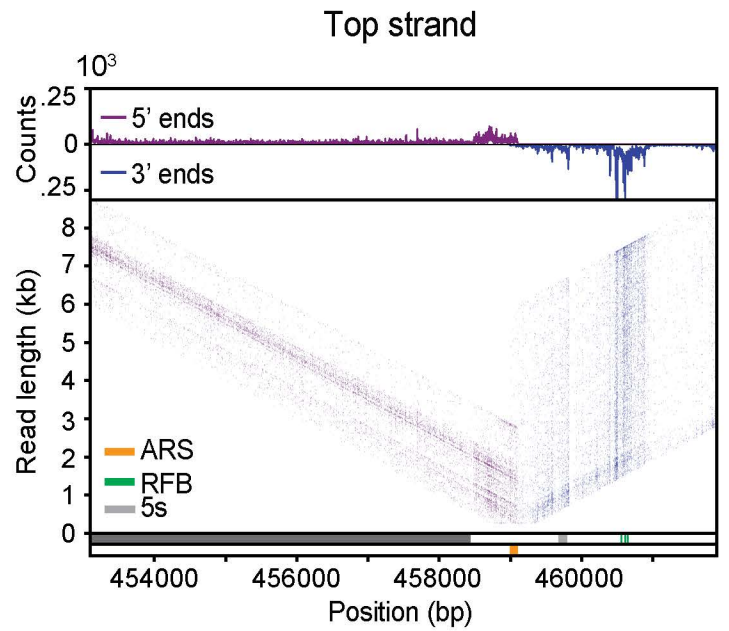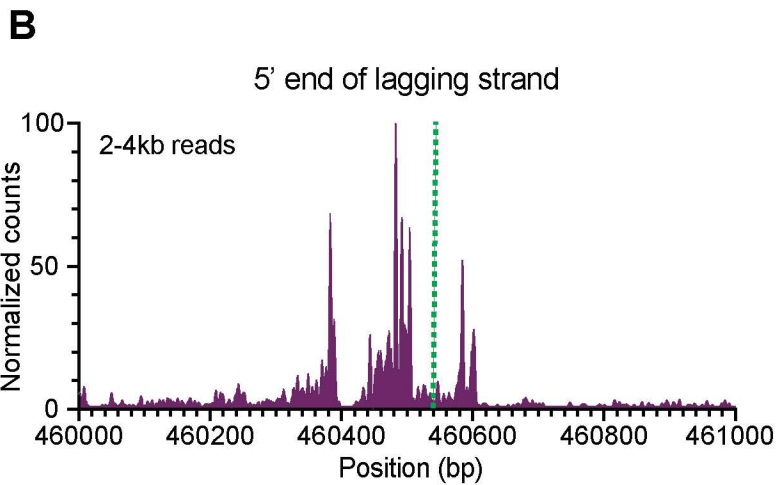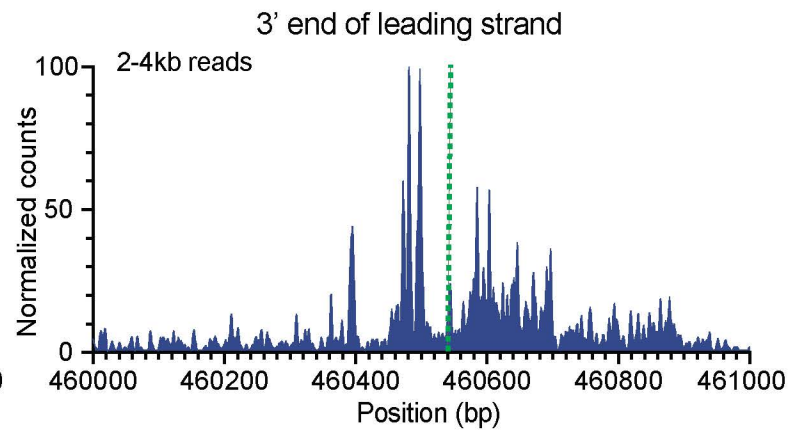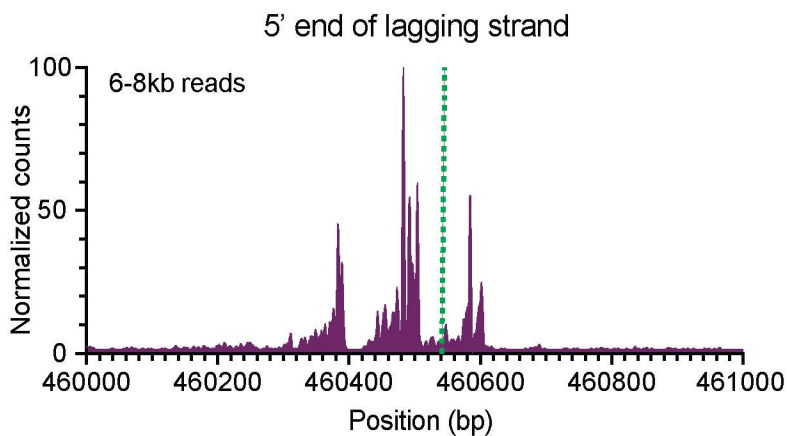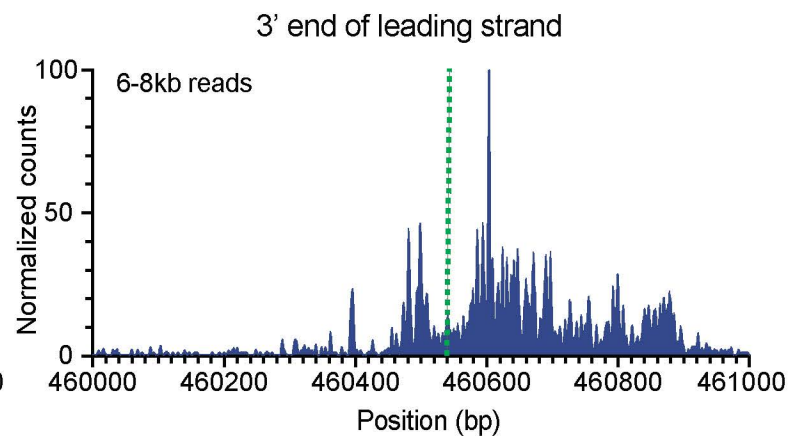

# Figure S11

TTAATGCTAGTTCGCCGCCTCGAAAATGAAAAGAGAAGAAGAGACCAGAAGAGCA  
ACTTCGCATTGcCACTGTTTATTTCTTTAAGAACATCTTCAATACTAAATAAGACAAC  
CCATCTTCAGTTATTTTTACTCTTGGTAGAGCCCACTTAGcATCCTTTTGAACCTCA  
AGAACTTAAAATGGCTGCTGCTACTTCTACTAAGAAGTTGCACAAGGAACCAGCT  
**ACTTTGATTAAGGCTATTGATGGTGATACTGTTAAGTTGATGTACAAGGGTCAAC**  
**CAATGACTTTCAGATTGTTGTTGGTTGATACTCCAGAACTAAGCACCCAAAGAA**  
**GGTGTTGAAAAGTACGGTCCAGAAGCTTCTGCTTTCACTAAGAAGATGGTTGAA**  
**AACGCTAAGAAGATTGAAGTTGAATTCGATAAGGGTCAAAGAAGTATAAGTAC**  
**GGTAGAGGTTTGGCTTACATTTACGCTGATGGTAAGATGGTTAACGAAGCTTTGG**  
**TTAGACAAGGTTTGGCTAAGGTTGCTTACGTTTACAAGCCAAACAACACTCACGA**  
**ACAACACTTGAGAAAGTCTGAAGCTCAAGCTAAGAAGGAAAAGTTGAACATTTG**  
**GTCTGAAGATAACGCTGATTCTGGTCAA***gattacaaggatcacgatggcggtagtggcagc***AT**  
GTCTCAACAGTCTAGCTCTCCAACAAAAGAGGATAATAACTCCAGCTCCCCCGTTG  
TGCCTAATCCTGATTCTGTTCCACCACAGCTTTCTTCCCAGCTCTATTTTATAGCT  
CCTCTTCATCACAAAGGTGATATCTATGGTCGCAACAATAGCCAGAACTTAAGTCAG  
GGAGAGGGAAACATCAGAGCTGCTATAGGTTCTTCTCCACTAAATTTTCCATCTTCT  
TCCCAAAGACAAAATTCCGATGTTTTCCAATCTCAAGGCAGACAGGGCAGAATTCG  
TTCTTCTGCGAGCGCTTCTGGAAGGTCTAGATATCATTCTGATCTGAGAAGTGATA  
GAGCACTGCCTACTTCTTCTTCTTTAGGCCGTAATGGTCAAACCGTGTACAC  
ATGCGAAGAAATGATATTCATACATCTGATTTATCCTCTCCAAGAAGAATTGTGGAT  
TTTGATACTAGATCCGGCGTGAATACTTTaGATACTTCTTCTTCTTCTGCTCCTCCAT  
CGGAAGCCAGTGAACCCTTGAGAATAATTTGGGGTA

# Figure S12

## RNA seq replicates

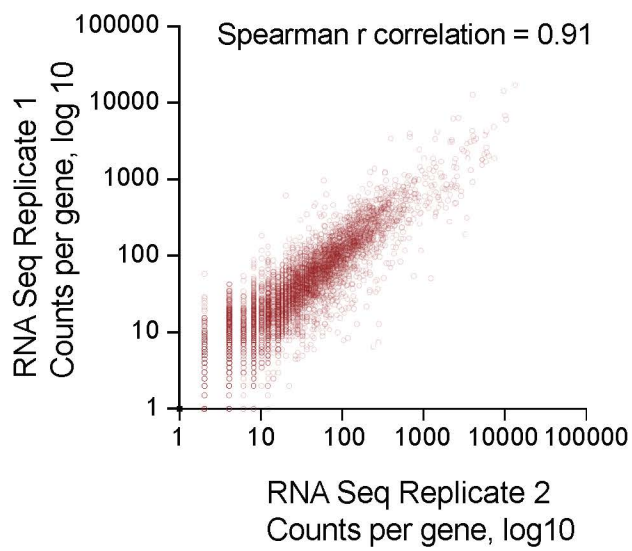

Supplement: NIHMS1786144-supplement-3.pdf [file NIHMS1786144-supplement-3.pdf]
